# Supplementary material for: Improved Muscle Function in Duchenne Muscular Dystrophy through L-Arginine and Metformin: An Investigator-Initiated, Open-Label, Single-Center, Proof-Of-Concept-Study
Source: PLOS journal article supplement (doi:10.1371/journal.pone.0147634), 2016-01-22
Supplement: S1 (10.1371/journal.pone.0147634.s001) [file journal.pone.0147634.s001]

## S1 CONSORT checklist of information to include when reporting a randomised trial

| Section/Topic             | Item No | Checklist item                                                                                                                                | Reported on page No |
|---------------------------|---------|-----------------------------------------------------------------------------------------------------------------------------------------------|---------------------|
| <b>Title and abstract</b> |         |                                                                                                                                               |                     |
|                           | 1a      | Information on how unit were allocated to interventions                                                                                       | N.A.                |
|                           | 1b      | Structured abstract recommended                                                                                                               | 2                   |
|                           | 1c      | Information on target population or study sample                                                                                              | 2                   |
| <b>Introduction</b>       |         |                                                                                                                                               |                     |
| Background                | 2a      | Scientific background and explanation of rationale                                                                                            | 3-4                 |
|                           | 2b      | Theories used in deigning behavioural interventions                                                                                           | N.A.                |
| <b>Methods</b>            |         |                                                                                                                                               |                     |
| Participants              | 3a      | Eligibility criteria for participants, including criteria at different levels in recruitment/sampling plan (e.g., cities, clinics, subjects)  | 5                   |
|                           | 3b      | Method of recruitment (e.g., referral, self-selection), including the sampling method if a systematic sampling plan was implemented           | 5                   |
|                           | 3c      | Recruitment setting                                                                                                                           | 5                   |
|                           | 3d      | Settings and locations where the data were collected                                                                                          | 5                   |
| Interventions             | 4a      | Details of the interventions intended for each study condition and how and when they were actually administered, specifically including       | 5-6                 |
|                           |         | - Content: what was given?                                                                                                                    | 5                   |
|                           |         | - Delivery method: how was the content given?                                                                                                 | 5                   |
|                           |         | - Unit of delivery: how were the subjects grouped during delivery?                                                                            | N.A.                |
|                           |         | - Deliverer: who delivered the intervention?                                                                                                  | 6                   |
|                           |         | - Setting: where was the intervention delivered?                                                                                              | 6                   |
|                           |         | - Exposure quantity and duration: how many sessions or episodes or events were intended to be delivered? How long were they intended to last? | 5                   |
|                           |         | - Time span: how long was it intended to take to deliver the intervention to each unit?                                                       | N.A.                |

|                     |     |                                                                                                                                                                                                                                        |                          |
|---------------------|-----|----------------------------------------------------------------------------------------------------------------------------------------------------------------------------------------------------------------------------------------|--------------------------|
|                     |     | - Activities to increase compliance or adherence (e.g., incentives)                                                                                                                                                                    | <b>6</b>                 |
| Objectives          | 5   | Specific objectives and hypotheses                                                                                                                                                                                                     | <b>4</b>                 |
| Outcomes            | 6a  | Clearly defined primary and secondary outcome measures                                                                                                                                                                                 |                          |
|                     | 6b  | Methods used to collect data and any methods used to enhance the quality of measurements<br>Information on validated instruments such as psychometric and biometric properties                                                         | <b>6-9</b><br><b>6-7</b> |
| Sample size         | 7a  | How sample size was determined and, when applicable, explanation of any interim analyses and stopping rules                                                                                                                            | <b>5</b>                 |
| Assignment Method   | 8a  | Unit of assignment                                                                                                                                                                                                                     | <b>N.A.</b>              |
|                     | 8b  | Methods used to assign units to study conditions, including details of any restriction                                                                                                                                                 | <b>N.A.</b>              |
|                     | 8c  | Inclusion of aspects employed to help minimize potential bias induced due to non-randomization                                                                                                                                         | <b>N.A.</b>              |
| Blinding            | 9   | Whether or not participants, those administering the interventions, and those assessing the outcomes were blinded to study condition assignment; if so, statement regarding how the blinding was accomplished and how it was assessed. | <b>9-10</b><br><b>1</b>  |
| Unit of Analysis    | 10a | Description of the smallest unit that is being analysed to assess intervention effects                                                                                                                                                 | <b>5</b>                 |
|                     | 10b | If the unit of analysis differs from the unit of assignment, the analytical method used to account for this                                                                                                                            | <b>N.A.</b>              |
| Statistical methods | 11a | Statistical methods used to compare study groups for primary methods outcome(s), including complex methods of correlated data                                                                                                          | <b>9</b>                 |
|                     | 11b | Statistical methods used for additional analyses, such as a subgroup analysis and adjusted analysis.                                                                                                                                   | <b>N.A.</b>              |
|                     | 11c | Methods for imputing missing data, if used                                                                                                                                                                                             | <b>N.A.</b>              |
|                     | 11d | Statistical software or programs used                                                                                                                                                                                                  | <b>9</b>                 |

## Results

|                         |     |                                                                                                                                                                                                         |               |
|-------------------------|-----|---------------------------------------------------------------------------------------------------------------------------------------------------------------------------------------------------------|---------------|
| Participant flow        | 12a | Flow of participants through each stage of the study: enrolment, assignment, allocation, and intervention exposure, follow-up, analysis                                                                 | <b>Fig. 1</b> |
|                         | 12b | Description of protocol deviations from study as planned, along with reasons                                                                                                                            | <b>Fig. 1</b> |
| Recruitment             | 13  | Dates defining the periods of recruitment and follow-up                                                                                                                                                 | <b>6</b>      |
| Baseline data           | 14a | Baseline demographic and clinical characteristics of participants in each study condition                                                                                                               | <b>N.A.</b>   |
| Numbers analysed        | 14b | Baseline characteristics for each study condition relevant to specific disease prevention research                                                                                                      | <b>N.A.</b>   |
|                         | 14c | Baseline comparison of those lost to follow-up and those retained, overall and by study condition                                                                                                       | <b>N.A.</b>   |
|                         | 14d | Comparison between study population at baseline and target population of interest                                                                                                                       | <b>9-20</b>   |
| Baseline equivalence    | 15  | Data on study group equivalence at baseline and statistical methods used to control for baseline differences                                                                                            | <b>9-20</b>   |
| Numbers analyzed        | 16a | Number of participants included in each analysis for each study condition, particularly when the denominators change for different outcomes; statement of the results in absolute numbers when feasible | <b>5</b>      |
|                         | 16b | Indication of whether the analysis strategy was “intention to treat” or, if not, description of how non-compliers were treated in the analyses.                                                         | <b>N.A.</b>   |
| Outcomes and estimation | 17a | For each primary and secondary outcome, a summary of results for each estimation study condition, and the estimated effect size and a confidence interval to indicate the precision                     | <b>N.A.</b>   |
|                         | 17b | Inclusion of null and negative findings                                                                                                                                                                 | <b>N.A.</b>   |
|                         | 17c | Inclusion of results from treating pre-specified causal pathways through which the intervention was intended to operate, if any                                                                         | <b>9-20</b>   |

|                    |     |                                                                                                                                                                                                                                                                               |              |
|--------------------|-----|-------------------------------------------------------------------------------------------------------------------------------------------------------------------------------------------------------------------------------------------------------------------------------|--------------|
| Ancillary analyses | 18  | Summary of other analyses performed, including subgroup or restricted analyses, indicating which are pre-specified or exploratory                                                                                                                                             | <b>N.A.</b>  |
| Adverse events     | 19  | Summary of all important adverse events or unintended effects in each study condition                                                                                                                                                                                         | <b>6</b>     |
| <b>Discussion</b>  |     |                                                                                                                                                                                                                                                                               |              |
| Interpretation     | 20a | Interpretation of the results, taking into account study hypotheses, sources of potential bias, imprecision of measures, multiplicative analyses, and other limitations or weaknesses of the study                                                                            | <b>21-24</b> |
|                    | 20b | Discussion of results taking into account the mechanism by which the intervention was intended to work (causal pathways) or alternative mechanisms or explanations                                                                                                            | <b>21-24</b> |
|                    | 20c | Discussion of the success of and barriers to implementing the intervention, fidelity of implementation                                                                                                                                                                        | <b>21-24</b> |
|                    | 20d | Discussion of research, programmatic, or policy implications                                                                                                                                                                                                                  | <b>24</b>    |
| Generalizability   | 21  | Generalizability (external validity) of the trial findings, taking into account the study population, the characteristics of the intervention, length of follow-up, incentives, compliance rates, specific sites /settings involved in the study, and other contextual issues | <b>24</b>    |

---
